# Supplementary material for: On the Validity and Phylogenetic Position of Eubrachiosaurus browni, a Kannemeyeriiform Dicynodont (Anomodontia) from Triassic North America
Source: PLoS One. 2013 May 31;8(5):e64203. doi: 10.1371/journal.pone.0064203 (PMC3669350; doi:10.1371/journal.pone.0064203)
Supplement: Appendix S4 — Data matrix used in the phylogenetic analysis. (NEX) [file pone.0064203.s004.nex]

#NEXUS
[written Wed Apr 03 23:32:39 CEST 2013 by Mesquite  version 2.75 (build 566) at Yggdrassil.local/192.168.0.10]

BEGIN TAXA;
	TITLE Anomodontia;
	DIMENSIONS NTAX=98;
	TAXLABELS
		Biarmosuchus Hipposaurus Archaeosyodon Titanophoneus Gorgonops Lycosuchus Glanosuchus Biseridens Anomocephalus Tiarajudens Otsheria Ulemica Suminia Patranomodon Galeops Galepus Galechirus Eodicynodon_oelofseni Eodicynodon_oosthuizeni Colobodectes Lanthanostegus Eosimops Prosictodon Diictodon Robertia Pristerodon Chelydontops Endothiodon Emydops Dicynodontoides Kombuisia Myosaurus Cistecephalus Cistecephaloides Kawingasaurus Rhachiocephalus Kitchinganomodon Oudenodon_bainii Tropidostoma Australobarbarus Odontocyclops Idelesaurus Aulacephalodon Pelanomodon Geikia_locusticeps Geikia_elginensis Elph Interpresosaurus Katumbia Delectosaurus Dicynodon_lacerticeps Dicynodon_huenei Daptocephalus_leoniceps Daqingshanodon_limbus Dinanomodon_gilli Peramodon_amalitzkii Vivaxosaurus_trautscholdi Jimusaria_sinkiangensis Sintocephalus_alticeps Basilodon_woodwardi Turfanodon_bogdaensis Keyseria_benjamini Gordonia_traquairi Euptychognathus_bathyrhynchus Syops_vanhoepeni Kwazulusaurus_shakai TSK_2 Lystrosaurus_hedini Lystrosaurus_maccaigi Lystrosaurus_curvatus Lystrosaurus_declivis Lystrosaurus_murrayi Kannemeyeria_simocephalus Sinokannemeyeria Dolichuranus Parakannemeyeria Xiyukannemeyeria Tetragonias Shansiodon Vinceria Rhinodicynodon Angonisaurus Dinodontosaurus Stahleckeria Jachaleria Ischigualastia Rabidosaurus Rhadiodromus Wadiasaurus Rechnisaurus Kannemeyeria_lophorhinus Sangusaurus Uralokannemeyeria Placerias Moghreberia Eubrachiosaurus Zambiasaurus Shaanbeikannemeyeria 
	;

END;


BEGIN CHARACTERS;
	TITLE  Continuous_characters;
	DIMENSIONS  NCHAR=21;
	FORMAT DATATYPE = CONTINUOUS GAP = - MISSING = ?;
CHARSTATELABELS 
		1 K1,
		2 real_k2,
		3 K3,
		4 K4,
		5 K5,
		6 K6,
		7 K7,
		8 K8,
		9 real_k9,
		10 K10,
		11 K11,
		12 K12,
		13 K13,
		14 K14,
		15 K15,
		16 K16,
		17 K17,
		18 K18,
		19 K19,
		20 K20,
		21 K21 ; 
	MATRIX
	Biarmosuchus                    0.693 ? 0.261 ? 0.148 ? 5.8 ? ? ? 1.06 ? 0.502 1.87 ? 0.446 ? 0.553 0.426 0.0 ?
	Hipposaurus                     0.606 ? 0.263 0.842 0.19 ? 3.5 ? ? ? 1.07 ? 0.539 2.63 0.667 0.367 0.125 ? ? 0.0 0.222
	Archaeosyodon                   ? ? ? ? ? ? 5.6 ? ? ? ? ? 0.92 ? ? ? ? ? ? ? ?
	Titanophoneus                   0.758 ? 0.244 0.7 0.227 ? 6.2 ? ? ? 1.16 ? 0.855 1.62 0.5 0.292 0.274 0.5 ? 0.0 0.343
	Gorgonops                       0.504 ? 0.29 1.15 0.305 ? 8.5 ? ? ? 0.977 ? ? ? ? 0.329 ? ? ? ? ?
	Lycosuchus                      0.509 ? 0.261 0.333 0.352 ? 7.7 0.094 ? ? 1.06 ? 0.595 1.71 0.5 0.333 0.294 ? ? 0.0 0.4
	Glanosuchus                     0.547 ? 0.145 0.25 0.367 ? 5.3 0.05 ? ? 1.02 ? 0.718 2.12 0.545 0.309 0.2 0.833 ? 0.0 0.342
	Biseridens                      ? ? ? 1.032 ? ? ? ? ? 11.0 ? ? 0.956 ? ? ? ? ? ? ? ?
	Anomocephalus                   ? ? ? ? ? ? ? ? ? ? ? ? ? ? ? ? ? ? ? ? ?
	Tiarajudens                     ? ? ? ? ? ? ? ? ? ? ? ? ? ? ? ? ? ? ? ? ?
	Otsheria                        0.381 5.893 0.231 ? 0.512 0.181 5.3 0.108 9.703 15.5 0.86 ? ? ? ? ? ? ? ? ? ?
	Ulemica                         0.47 5.922 0.125 1.06 0.407 0.216 4.9 ? 9.703 15.4 1.098 0.294 0.939 1.135 ? ? ? ? ? ? ?
	Suminia                         0.352 5.802 0.205 ? 0.225 0.198 5.0 0.09 9.706 11.6 0.902 0.395 0.842 1.094 0.558 0.296 0.13 0.557 0.758 0.0 0.289
	Patranomodon                    0.29 ? 0.228 0.914 0.272 0.202 6.0 0.043 9.705 13.7 0.744 0.476 1.25 1.059 ? ? ? ? ? 0.0 ?
	Galeops                         0.339 5.832 0.18 ? 0.327 0.136 4.1 ? 9.705 ? ? 0.489 0.831 0.968 0.646 0.351 0.181 ? ? ? 0.257
	Galepus                         ? ? ? ? ? ? ? ? ? ? ? ? ? ? ? ? 0.149 ? ? 0.0 ?
	Galechirus                      ? ? ? ? ? ? ? ? ? ? ? 0.355 0.865 0.7 ? 0.401 0.206 ? ? 0.0 ?
	Eodicynodon_oelofseni           0.351 ? ? 0.968 0.435 ? ? ? ? 12.0 ? 0.259 0.708 ? ? ? ? ? ? ? ?
	Eodicynodon_oosthuizeni         0.321 5.876 0.24 0.909 0.525 0.143 9.1 0.168 9.704 9.0 0.839 0.242 0.686 1.026 0.454 0.473 0.242 0.686 1.143 0.0 0.962
	Colobodectes                    0.203 5.852 0.195 ? 0.52 0.149 6.6 0.206 9.703 ? 0.948 ? ? ? ? ? ? ? ? ? ?
	Lanthanostegus                  ? ? ? 0.661 ? ? ? ? ? ? ? ? ? ? ? ? ? ? ? ? ?
	Eosimops                        0.19 5.913 0.238 0.746 0.519 0.123 8.7 0.175 9.703 11.4 0.83 0.402 0.803 0.904 0.633 0.466 0.26 ? ? 0.0 ?
	Prosictodon                     0.238 5.88 0.171 0.864 0.548 0.098 8.1 0.131 9.704 9.3 0.882 ? 0.834 0.637 ? ? ? ? ? ? ?
	Diictodon                       0.239 5.881 0.189 0.611 0.545 0.134 7.7 0.212 9.703 10.4 0.89 0.23 0.754 0.883 0.424 0.49 0.273 0.748 1.525 0.0 0.471
	Robertia                        0.238 5.895 0.202 0.717 0.56 0.105 8.3 0.198 9.703 9.8 0.852 0.14 0.647 0.848 0.487 0.504 0.228 ? ? 0.0 0.407
	Pristerodon                     0.222 5.85 0.172 1.009 0.586 0.116 9.9 0.207 9.705 10.7 0.815 0.184 0.714 0.917 0.561 0.447 ? 0.348 0.727 0.0 0.333
	Chelydontops                    0.25 5.945 0.152 ? 0.546 0.108 6.4 ? 9.702 11.3 ? 0.155 0.758 0.736 ? ? ? ? ? ? ?
	Endothiodon                     0.314 6.051 0.384 0.275 0.588 0.11 8.9 0.147 9.7 7.3 0.96 0.405 0.816 0.745 0.536 0.509 0.431 0.296 0.818 0.0 0.6
	Emydops                         0.23 5.802 0.202 0.893 0.543 0.116 9.8 0.179 9.706 9.0 0.843 0.348 0.706 0.933 0.626 0.42 0.23 0.946 1.752 0.0 ?
	Dicynodontoides                 0.266 5.969 0.227 0.759 0.555 0.083 8.4 0.175 9.701 11.55 0.882 ? 0.725 0.917 0.304 0.529 ? 0.143 0.81 0.403 0.4
	Kombuisia                       0.193 5.866 0.202 0.4 0.555 0.195 ? ? 9.704 ? 0.746 ? 0.684 ? ? ? ? ? ? ? ?
	Myosaurus                       0.251 5.771 0.259 0.955 0.474 0.085 9.15 0.208 9.706 9.05 0.858 0.348 0.958 0.942 0.586 ? ? ? ? ? ?
	Cistecephalus                   0.265 5.861 0.278 1.143 0.528 0.118 9.7 0.0 9.705 9.2 0.873 0.4 0.687 0.784 0.46 0.412 0.317 0.618 1.629 0.0 0.294
	Cistecephaloides                0.311 5.835 0.425 1.319 0.372 0.194 ? ? 9.705 12.5 0.632 0.346 0.796 0.914 ? ? ? ? ? ? ?
	Kawingasaurus                   0.306 5.77 0.329 1.429 0.399 0.135 10.55 ? 9.706 10.0 0.844 0.286 ? 0.964 0.298 0.419 ? ? ? ? ?
	Rhachiocephalus                 0.318 6.097 0.264 0.704 0.592 0.091 8.65 0.14 9.699 12.6 0.975 0.145 0.742 0.778 0.501 0.506 ? ? ? ? ?
	Kitchinganomodon                0.323 6.112 0.322 0.743 0.567 0.114 7.7 0.074 9.698 11.7 0.919 0.156 0.818 0.736 ? 0.466 ? ? ? ? ?
	Oudenodon_bainii                0.282 5.995 0.171 0.853 0.604 0.09 8.3 0.137 9.701 11.3 0.863 0.274 0.799 0.743 0.61 0.495 0.365 0.636 0.938 0.376 0.493
	Tropidostoma                    0.291 5.977 0.198 0.878 0.579 0.095 8.35 0.131 9.701 12.4 0.853 0.217 0.743 0.735 0.552 0.499 ? 0.45 1.3 0.293 ?
	Australobarbarus                0.338 5.974 0.184 0.68 0.536 0.11 6.1 0.16 9.701 13.35 0.895 0.256 0.745 0.75 ? ? ? ? ? ? 0.5
	Odontocyclops                   0.37 6.09 0.234 0.964 0.594 0.097 10.3 0.116 9.699 12.55 0.933 0.221 0.778 0.784 0.609 0.524 0.386 0.385 1.0 0.469 0.708
	Idelesaurus                     0.367 6.006 0.175 1.022 0.5 0.107 8.25 0.173 9.701 13.45 0.969 0.193 0.693 0.762 ? ? ? ? ? ? ?
	Aulacephalodon                  0.3 6.069 0.326 0.852 0.586 0.118 6.6 0.124 9.699 13.65 0.82 0.194 0.755 0.781 0.55 0.526 0.345 1.024 1.195 0.395 0.559
	Pelanomodon                     0.293 6.0 0.301 0.885 0.574 0.105 9.6 0.153 9.701 12.0 0.81 ? 1.038 0.879 ? ? ? ? ? ? ?
	Geikia_locusticeps              0.263 5.96 0.281 0.88 0.545 0.098 9.4 0.141 9.701 13.9 0.761 0.205 0.818 0.848 ? ? ? ? ? ? ?
	Geikia_elginensis               0.366 ? 0.521 0.846 0.529 ? ? ? ? 13.1 0.829 0.212 0.9 0.987 ? ? ? ? ? ? ?
	Elph                            0.279 5.879 0.186 0.64 0.544 0.157 8.9 ? ? 12.95 0.914 ? 0.781 ? ? ? ? ? ? ? ?
	Interpresosaurus                ? ? ? ? ? ? ? ? ? ? ? ? ? ? ? ? ? ? ? ? ?
	Katumbia                        0.18 5.942 0.22 0.527 0.541 0.11 9.4 0.132 9.702 14.4 ? ? 0.833 0.822 ? ? ? ? ? ? ?
	Delectosaurus                   0.369 5.952 0.258 0.702 0.546 0.119 7.8 0.13 9.702 14.7 0.985 ? ? ? ? ? ? ? ? ? ?
	Dicynodon_lacerticeps           0.316 5.974 0.236 0.621 0.529 0.115 7.5 0.117 9.701 12.0 0.916 0.178 0.771 0.752 ? ? ? ? ? ? ?
	Dicynodon_huenei                0.304 6.047 0.248 0.567 0.56 0.108 8.3 0.111 9.7 11.55 0.976 0.206 0.756 0.818 0.538 0.573 0.317 0.667 1.4 0.374 0.63
	Daptocephalus_leoniceps         0.269 6.071 0.231 0.564 0.56 0.118 6.5 0.107 9.7 ? 0.858 0.23 0.764 0.751 ? 0.545 ? ? 2.143 ? ?
	Daqingshanodon_limbus           0.282 5.863 0.26 0.619 0.442 0.08 ? 0.189 9.704 10.3 0.808 0.212 0.677 0.819 ? ? ? ? ? ? ?
	Dinanomodon_gilli               0.344 6.084 0.21 0.407 0.608 0.119 7.1 0.11 9.699 9.9 1.046 0.186 ? 0.724 ? ? ? ? ? ? ?
	Peramodon_amalitzkii            0.272 ? 0.224 0.563 0.553 ? ? ? ? 9.5 0.839 0.167 0.676 0.68 0.463 ? ? ? ? ? ?
	Vivaxosaurus_trautscholdi       0.361 6.002 0.226 0.667 0.478 0.118 7.9 0.111 9.701 13.9 1.023 0.203 0.702 0.731 0.317 0.544 ? ? ? ? ?
	Jimusaria_sinkiangensis         0.307 ? 0.278 0.672 0.767 0.089 7.2 0.098 ? 8.9 0.992 0.251 ? 0.699 ? ? ? ? ? ? ?
	Sintocephalus_alticeps          0.354 5.979 0.244 0.516 0.522 0.124 6.5 0.132 9.701 ? 1.022 ? ? ? ? ? ? ? ? ? ?
	Basilodon_woodwardi             0.304 5.971 0.207 0.7 0.492 0.129 6.1 0.133 9.701 11.1 0.802 ? ? ? ? ? ? ? ? ? ?
	Turfanodon_bogdaensis           ? ? ? 0.588 ? ? ? ? ? 10.3 0.895 ? ? ? ? ? ? ? ? ? ?
	Keyseria_benjamini              0.244 5.961 0.159 1.034 0.605 0.083 6.3 ? ? 9.0 0.831 ? ? ? ? ? ? ? ? ? ?
	Gordonia_traquairi              0.239 ? 0.139 0.65 0.585 ? ? ? ? ? 0.924 0.188 ? 0.773 0.543 0.49 0.144 ? ? ? ?
	Euptychognathus_bathyrhynchus   0.327 6.015 0.13 0.562 0.56 0.091 6.5 0.084 9.7 10.25 0.792 ? 0.79 0.815 ? ? ? ? ? ? ?
	Syops_vanhoepeni                ? ? ? 0.484 ? ? ? ? ? ? ? ? ? ? ? ? ? ? ? ? ?
	Kwazulusaurus_shakai            0.287 5.929 0.243 0.806 0.342 0.168 9.2 0.078 9.702 10.7 0.888 ? ? ? ? ? ? ? ? ? ?
	TSK_2                           0.385 5.947 0.24 0.321 ? 0.135 ? 0.124 9.702 ? 0.997 ? ? ? ? ? ? ? ? ? ?
	Lystrosaurus_hedini             0.336 5.927 0.433 0.687 0.398 0.167 9.2 0.08 9.703 11.2 0.693 0.28 0.651 0.792 ? ? ? ? ? ? ?
	Lystrosaurus_maccaigi           0.263 6.027 0.341 0.656 0.325 0.159 9.0 0.087 9.7 10.9 0.805 0.354 0.711 0.706 ? 0.526 0.54 ? ? 0.389 ?
	Lystrosaurus_curvatus           0.292 5.939 0.382 0.613 0.431 0.159 7.05 0.084 9.703 8.8 0.871 ? 0.767 0.643 0.466 0.479 0.516 0.943 1.577 0.322 ?
	Lystrosaurus_declivis           0.327 5.947 0.408 0.708 0.414 0.155 8.85 0.105 9.702 9.95 0.838 0.348 0.756 0.719 0.418 0.459 0.466 1.0 1.733 0.341 ?
	Lystrosaurus_murrayi            0.292 5.916 0.432 0.672 0.463 0.176 8.35 0.104 9.703 12.55 0.804 0.296 0.802 0.751 0.475 0.459 0.447 1.06 1.845 0.392 0.94
	Kannemeyeria_simocephalus       0.425 6.072 0.402 0.272 0.527 0.149 9.85 0.071 9.699 13.6 1.151 0.179 0.826 0.671 0.63 0.557 0.34 ? 1.261 0.359 0.404
	Sinokannemeyeria                0.439 6.106 0.488 0.57 0.393 0.161 5.9 0.109 9.698 ? 0.918 0.243 0.549 0.385 0.494 0.489 0.556 0.523 1.365 0.408 0.487
	Dolichuranus                    0.412 6.079 0.347 0.28 0.485 0.133 7.45 0.091 9.699 10.7 0.959 0.192 0.756 0.542 ? 0.536 ? ? ? 0.425 ?
	Parakannemeyeria                0.442 6.106 0.362 0.367 0.357 0.122 7.5 0.104 9.698 12.4 0.923 0.166 0.79 0.515 0.467 0.52 0.48 0.6 2.105 0.4 0.4
	Xiyukannemeyeria                0.286 6.042 0.413 0.46 0.433 0.168 8.45 0.086 9.7 8.9 0.795 0.32 ? 0.667 ? ? ? ? ? ? ?
	Tetragonias                     0.35 6.005 0.354 0.233 0.574 0.125 6.8 0.088 9.701 10.4 1.004 0.205 0.858 0.796 0.447 0.481 0.3 0.674 1.825 0.286 0.793
	Shansiodon                      0.315 5.968 0.338 0.164 0.52 0.12 7.2 0.1 9.702 9.8 1.116 0.286 0.821 0.84 0.575 0.479 ? 0.784 1.409 0.363 0.675
	Vinceria                        0.267 5.993 0.352 0.201 0.49 0.137 7.0 0.153 9.701 11.25 0.983 ? ? ? ? ? ? ? ? ? ?
	Rhinodicynodon                  0.304 5.982 0.253 0.5 0.523 0.1 ? ? 9.701 10.1 0.879 0.24 0.875 0.734 ? ? ? ? ? ? ?
	Angonisaurus                    0.339 6.037 0.514 0.667 0.572 0.19 5.9 0.06 9.7 10.0 1.012 0.143 0.785 0.722 ? 0.524 ? 0.579 2.274 ? ?
	Dinodontosaurus                 0.4 6.046 0.347 0.231 0.465 0.137 7.4 0.074 9.701 10.4 0.937 0.191 0.85 0.587 0.398 0.51 0.423 0.667 1.739 0.305 0.8
	Stahleckeria                    0.489 6.109 0.489 0.726 0.49 ? ? ? 9.698 8.65 0.953 0.238 0.857 0.897 0.442 0.53 ? 0.346 1.962 0.447 0.632
	Jachaleria                      0.392 6.103 0.393 0.199 0.379 0.161 4.0 0.084 9.698 ? 0.766 ? 0.822 0.766 0.427 ? 0.529 ? 0.791 ? 0.856
	Ischigualastia                  0.499 6.133 0.403 0.291 0.468 0.141 5.65 0.064 9.698 ? 1.03 ? 0.9 0.841 0.41 0.577 0.561 ? 0.96 0.412 0.84
	Rabidosaurus                    0.464 ? ? 0.268 0.607 ? ? ? ? ? ? ? ? ? ? ? ? ? ? ? ?
	Rhadiodromus                    0.509 6.076 0.403 0.285 0.574 0.122 6.9 0.088 9.699 10.8 1.085 ? ? ? ? ? 0.604 ? ? ? ?
	Wadiasaurus                     0.423 6.065 0.337 0.539 0.506 0.218 ? ? ? 10.6 1.052 0.344 0.9 0.81 0.607 0.563 0.45 0.471 1.039 0.417 ?
	Rechnisaurus                    0.51 6.066 0.436 0.154 ? 0.14 9.9 ? ? ? ? ? ? ? ? ? ? ? ? ? ?
	Kannemeyeria_lophorhinus        0.361 6.078 ? ? ? 0.149 ? 0.063 9.699 ? ? 0.077 0.786 0.542 ? ? ? ? ? ? ?
	Sangusaurus                     0.339 6.064 0.447 0.618 ? ? ? ? ? ? ? ? ? ? ? ? ? 0.676 2.22 0.311 ?
	Uralokannemeyeria               0.49 ? 0.407 0.526 0.454 0.147 ? 0.091 ? 11.9 1.154 ? ? ? ? ? ? 0.819 1.193 ? ?
	Placerias                       ? ? ? ? ? ? ? ? ? ? ? ? ? ? ? 0.49 0.499 ? ? ? ?
	Moghreberia                     ? ? ? ? ? ? ? ? ? ? ? ? ? ? ? ? ? ? ? ? ?
	Eubrachiosaurus                 ? ? ? ? ? ? ? ? ? ? ? ? ? ? ? 0.538 ? ? 1.789 ? ?
	Zambiasaurus                    ? ? ? ? ? ? ? ? ? ? ? ? ? ? ? 0.498 ? ? ? 0.401 ?
	Shaanbeikannemeyeria            0.523 ? 0.55 0.433 0.595 0.177 6.23 0.148 ? 12.8 1.537 ? 0.538 ? ? 0.448 ? ? ? 0.374 ?

;

END;
BEGIN CHARACTERS;
	TITLE  Character_Matrix;
	DIMENSIONS  NCHAR=153;
	FORMAT DATATYPE = STANDARD GAP = - MISSING = ? SYMBOLS = "  0 1 2 3 4 5 6 7 8 9 A B C D E F G H J K M N P Q R S T U V W X Y Z";
	CHARSTATELABELS 
		1 K21, 2 K22, 3 K23, 4 K24, 5 K25, 6 K26, 7 K27, 8 K153, 9 K28, 10 K29, 11 K30, 12 K31, 13 K156, 14 K32, 15 K33, 16 K34, 17 K35, 18 K36, 19 K37, 20 K38, 21 K39, 22 K40, 23 K41, 24 K42, 25 K43, 26 K44, 27 K152, 28 K45, 29 K46, 30 K47, 31 K155, 32 K48, 33 K154, 34 K49, 35 K151, 36 K50, 37 K51, 39 K52, 40 K53, 41 K143, 42 K54, 43 K55, 44 K56, 45 K57, 46 K58, 48 K59, 49 K146, 50 K60, 51 K61, 52 K62, 53 K63, 54 K64, 55 K65, 56 K66, 57 K67, 58 K157, 59 K68, 60 K69, 61 K70, 62 K71, 63 K72, 64 K73, 65 K74, 66 K75, 67 K76, 68 K77, 69 K78, 70 K79, 71 K80, 72 K81, 73 K82, 74 K163, 75 K83, 77 K84, 78 K85, 79 K86, 80 K150, 81 K87, 82 K88, 83 K89, 84 K90, 85 K91, 86 K92, 87 K93, 88 K94, 89 K95, 90 K96, 91 K97, 92 K98, 93 K99, 94 K100, 95 K101, 96 K144, 97 K147, 98 K102, 99 K103, 100 K104, 101 K105, 102 K106, 103 K107, 104 K108, 105 K109, 106 K142, 107 K110, 108 K111, 109 K112, 110 K113, 111 K114, 112 K148, 113 K115, 114 K116, 115 K117, 116 K118, 117 K158, 118 K119, 119 K120, 120 K121, 121 K122, 122 K123, 123 K124, 124 K161, 125 K125, 126 K159, 127 K160, 128 K126, 129 K127, 130 K128, 131 K129, 132 K130, 133 K131, 134 K149, 135 K132, 136 K133, 137 K135, 138 K140, 142 K134, 143 K136, 144 K145, 145 K137, 146 K162, 147 K138, 148 K139, 153 K141 ; 
	MATRIX
	Biarmosuchus                   0000200000000000010000000????000000000000002000200000000001000010010000000000001201??0???0??00???0000000100000??00000000000?0000?100001101?0?00110001111?
	Hipposaurus                    0000200000000000010000000????000000000000012000000000000001000010110000000000001001??0?0?0???0000?000000100000??00000000000?10000100011101?????0?000110??
	Archaeosyodon                  0000200000000000010000100????00000001000000200010000000000100??01000010000000001201??0????????????000011100000??00???????0???????????????????????????????
	Titanophoneus                  0000200000000010000000000????00000001001000100000020000000100000100001000000000120100000?001000100000000100000??00100000000?00000?0000000022?001100022?2?
	Gorgonops                      0000200000000000000000000????00000000100001200020010000000100001000000000000000120100000?000000000000000100000??00001000000?0000010001000110101101111012?
	Lycosuchus                     0000200000000000000001000????000200000000001020110100000001000001001411000000001201001001001?00000000000100000??01000100000?000001000100012210???000?????
	Glanosuchus                    0000200000000000010000000????000000000000101020110100000001000001001411000000001201000001001000000000000100000??01000100000?0000010001000122100100002212?
	Biseridens                     0000200000000010010000100????00000001000100200010020000000100??00000010000000000?01??????0???0000?001010000000??0000?1???0???????????????????????????????
	Anomocephalus                  ?????0?????00??0?0??2???0??????0???0???00???????????0??000?0?1?????????????1?????2????????????????1??0100????0???????????????????????????????????????????
	Tiarajudens                    0????0?0??00001000002??00????000??00?0??0???????????00?000?0?1???????????011??0??2???????????????????????????????????????????????????????????????????????
	Otsheria                       0000201000000?1001?100?00?????00000000000002?0010?00000010101??11??1000010100000011???0000???11??????????????????????????????????????????????????????????
	Ulemica                        0000201010000?1001?000100????00000001000000200010?0010001010?0011001130010100100011??10010?10?1?0010101100000100(0 1)000010011???????????????????????????????
	Suminia                        000020101000001001?100200?????0010000000000210010?00100010?01001100?1302101001010110?10000010101??1000210000010000000000110?0000000000000110100000001011?
	Patranomodon                   0000?0101?00002000?100100?????00000000000010100000100000100000000001010?01100001011??00000?101010?10?010000000????001000010??????????????02210???000?????
	Galeops                        000020101000002000?100100??????1?000000000??1000?0??10001010?0100001?10?0?10000?0110?1?1??????????1000??00000100?111100011??0010000000100???????????????0
	Galepus                        ?0002?1????00??0????????0??????????????00??????????????????????????????????????????????????????????0?0100?000????????????1??????1?00010?0?22??00?000?2?2?
	Galechirus                     00?0?010?0?00??000?1001?0??????1??00???????????????????????0??????????????????????????????????????10?01000??0??????01????1???0000??0?1000022??00?0002212?
	Eodicynodon_oelofseni          ?????01?100000200001001?0????????0?00000001??00100001010200????00001120????012?1310??000?0?????100101110100001001?1?1??111???????????????????????????????
	Eodicynodon_oosthuizeni        000102101000002000020010100000011000000000101001001011102010110000011201001012013100100000011111001010101010020010110111110?0001000000110?22101000002???1
	Colobodectes                   010102101000002000020010100000011000001000111000001?111020101??0001112010010120131001000100??1???????????????????????????????????????????????????????????
	Lanthanostegus                 ????????1????0?????200?1?????0???0?010001011?0010020???000?0???0???11201?010120?310?100?10???????????????????????????????????????????????????????????????
	Eosimops                       111102111000002000021011120001010000100010111001002011102011110101111201001012013100?0001001?1110?1011??3001110000111?11110?10011?0000010?22101000002????
	Prosictodon                    111102111000002000021011120001011000100000111200002?1110201111010001120100101201210??000100111110?1011??10111100?01?1??111???????????????????????????????
	Diictodon                      111102111000002000022??1120001(0 1)1(0 1)00010000011120000(1 2)011102011110111111201001013012100000020011110001012??1011110010111111111?1001100000000?221010000022120
	Robertia                       111102111000002000021011120001010000100000111001002011102011110100011201001013012100?0001001?1110010111010111100?0111111110?1001?00000000?221???00002212?
	Pristerodon                    1101221010000020000210111000000100001000?0111001001111102011110100011202101012012100100020011111001011201?12020010111111112?1101000000100?22101?00002212?
	Chelydontops                   1001221010000020000211?110000001?000100??01110010020111???1?11?11001120100101301310010002001?1100?10112010120100??1111?111???????????????????????????????
	Endothiodon                    1000211010000020100111200??????2?001000101111101012?1110201011010001120210101301310000002001?111001011202012010010111111111?00010?0000100?2210???00022120
	Emydops                        10111210100000200002001111010101000000000011100100101010201111011111120110101(2 3)002100000120010111001011(1 2)0300202101011111111??1?01??00000002221????0002212?
	Dicynodontoides                101202101000012000022??1110100010000001000111200001011102010110100011201101013002100000120010111002012??31000210101111111110010110120001?1???011001122120
	Kombuisia                      101212101000012?00012??01101010100000010001102011?(1 4)01?1020?011?1???112011010?300?1??1001200101010?2012??311002001?11110111???????????????????????????????
	Myosaurus                      100212101000012000012??1110101012000001000120002001010102010110111110211101012012100100120011111001012??31000210??111??1110?11011010110??????0???????????
	Cistecephalus                  101212101000012010012??111010101000(0 1)101(0 1)000210020011101020011101101112111010120021?00?0120001?110?1112??3002021010111111110?11000121100111221010011022120
	Cistecephaloides               100212101000012010012??011010001000001100002100200111010200011011011?2?1101013?0?1????0110?1??110?1112??300202101?11111111???????????????????????????????
	Kawingasaurus                  100212101000012010012??0110100002000001000021002004?10102001?101101112111010130011????0110?0??11001012????000100111??11111??11000?2100011?221???????2212?
	Rhachiocephalus                120222101100002000012??1100010020011000100111200003011102011110111112201101013012100001220011111001112??101301001011111111??0011(0 1)11010100????????011????1
	Kitchinganomodon               120222101100002000012??11000100200110001001112000031111120111111101122011010120131?0?0122011?1110?1112??101?0121???111?111???00???10?010?????????????????
	Oudenodon_bainii               120222101100002000012??11010100210(0 1)0100000111100001111112011110111112201101013012100001220011111001112??101301211011111111200001001010100?221011101122120
	Tropidostoma                   120222101100002000021011101010021010100000111100001111112011110110012201101013012100?01220011111001111??101301211?111111112?0001001010100????0???011????0
	Australobarbarus               1202221011000020000210?110101002?0?010000011110000111111201111011111220100101311210??012201111110?111120101301211?111??111???????????????????????????????
	Odontocyclops                  120222101100002000022??1101010020012000000311100000111112011110111112201101013012100?0122011?1110?1112??10130121??1111?111200001??1010100????0111011?????
	Idelesaurus                    120222101100002000022??11010100210110000001111000010111120111101100122011110120121000002201??1010?1112??111301211?11111111???????????????????????????????
	Aulacephalodon                 120222101110002000022??110100002011200(0 1)10030100100201111201111011011220111101301210000122(0 1)011111001112??101301211111111111210001001010100?221010101122121
	Pelanomodon                    120222101110002000012??1101010020112001100301001002011112011110111112201111013112100?012210111110???????????????????????1????????????????????????????????
	Geikia_locusticeps             120222101110002000012??11010100201121011003111000020101120111101111122011110131121000022210111110?1112??111301011011111111??00?10????????????????????????
	Geikia_elginensis              120222101110002000012??1101011120??21??100???10000?01111201??1?11111220?1??013??210?10????????????1012??11130121????1??111?????????0101??????????????????
	Elph                           1??202101000002010022??1101001000000100000111200001011102011110????122011010?30?11?0001220???1110?1112??1013012111??????11???????????????????????????????
	Interpresosaurus               120??2101000002010022??1101001?0?000100???1??2?1???????????????1???1?20??0???????????????????????????????????????????????????????????????????????????????
	Katumbia                       120222101?0000??10022??11000010100001000003112000010111?2011?1011111220110101310210??01221111?010?1112??1113012111??????11???????????????????????????????
	Delectosaurus                  120222101000002100022??110100001100010000021120101101110201111011111320111(1 2)013112110?01221???10100???????????????????????????????????????????????????????
	Dicynodon_lacerticeps          120222101000002000022??110100001(0 1)001100000211201011011102011110111113201111013012100002221111111011112??111302211111111111???????????????????????????????
	Dicynodon_huenei               120222101000002000022??110100001000110(0 1)000211201011011112011110111113201111013112100002221111111011112??1?13022111111111112?0001011010100?2210111011?????
	Daptocephalus_leoniceps        120222101000002000022??1101001011001100000211201011011102011110111113201111013101110101221111111111112??111302211111111111????????101110?????0111????????
	Daqingshanodon_limbus          120222101000002000022??11010100200?00010003111000010111?201111011??1220110101301210?00???????111??1112??111301211?11111111???????????????????????????????
	Dinanomodon_gilli              120222101000002110122??1101000(0 1)1100110000021120101101110201111011111320110101310211??01221111111?11?1????1?3?121???111?11????????????????????????????????
	Peramodon_amalitzkii           1??????0?00000201002???11?10010110001000002112010?1011102011?10?????????????13??21?0?0?221?11??1??111???11???22111?111?11?3?100101???????????????????????
	Vivaxosaurus_trautscholdi      120222101000002010022??110100011100000000021110101101110201111011001320111(1 2)013112110?0222(0 1)?1?111011112??11130221??11110111??000??1101110?????????????????
	Jimusaria_sinkiangensis        120??210110000200002???1102000010000100000211201011111102011110????1?201?110130?211010222111?1????1112??11130221100111?111???????????????????????????????
	Sintocephalus_alticeps         1202221010000?2000022??11000000010110000001111010?1111?020?1???????132011?10131?210??0??????????????????????????????????1????????????????????????????????
	Basilodon_woodwardi            120222101100002000022??11000000200111000001111010011111020111101111132011110131?210??01221?1?1110?1?1????1???221????1???1????????????????????????????????
	Turfanodon_bogdaensis          12???2101?0000???0?22??1101001111001000??021120101111110201?1??????13201??201311211??01221???11101???????????????????????????????????????????????????????
	Keyseria_benjamini             1202221010000?2000022??11010110200000000001110000?101110201111011??1220?1?101300210??01?210111110???????????????????????1????????????????????????????????
	Gordonia_traquairi             1202?21?10000??000022??1101001?2?0?010?0001112010?1?11112011?10?1??1?2??????131??1???0??2??11??1??1112??1??30221???11??111???001??10?0100????0???????????
	Euptychognathus_bathyrhynchus  120222101101102000022??1101001?0?1?1000000?11201011?1110201111011111320?1???13?1210??022?11??1110?1112??111302211???1???11???????????????????????????????
	Syops_vanhoepeni               1??1221011000?2000022??1101011020011?00??02112010110??1????11?0111112201111?131??1?????2??0??1010?1?1???10??????????11?11????????????????????????????????
	Kwazulusaurus_shakai           120222101101102000022??110?000101000?000001?10010?10111020111??11111?20?1?2?1310411??02221???111?????????????????????????????????????????????????????????
	TSK_2                          120222101101102000022??1101000100011100??01111010?1???1???1?1??1111132011?10131?2100002221???1110????????????????????????????????????????????????????????
	Lystrosaurus_hedini            120222101111102000022??1101000020011000100211001011011102011110111113201112?1310411??022210??111011112??111302211011110111?????1?????????????????????????
	Lystrosaurus_maccaigi          1202221011111?2000022??110100110101110?1002?10010?101110201111?111113201012?1310411??022210??1110?1112??11130221??111??1113????????010100?221?11?00122121
	Lystrosaurus_curvatus          120222101111102000022??1101001021011100100211001011011102011110111113201012?13112110002221???10101111????1???22110?111?11???0001??10101?0????1???001?????
	Lystrosaurus_declivis          120222101111102000022??1101001021111100100211001011011102011110111113201012?13112110002221011101011112??1113022110111101113?0??1??1011100?221111101122121
	Lystrosaurus_murrayi           120222101111102000022??1101001020111000100111001011011102011110111113201012?1311211?002221111111001112??111302211011110111??0001111011100?2211??101122121
	Kannemeyeria_simocephalus      120222101000002110022??0102000032000001101111211021111102011110111113201112?131011111022201??110011112??111302211011111111300011001010100?221011101122121
	Sinokannemeyeria               120222101000002120022??11010000310?100110121120101111010201111111111?201??2?131?211??02220?11110011112??111301211??011?1112000010?1210101?2210???0112212?
	Dolichuranus                   120222101100002110022??1102000030001001100111211021110102011110111113201011013112110?02220???1100?1112??111301211?1011?111??0000??1200101????????012?????
	Parakannemeyeria               120222101100002020122??110200003?011001101211201011110102111110111113201?12?13101110?02220111110011112??111?0121??1?11?1113?0001001010100?2210111(0 1)112212?
	Xiyukannemeyeria               120??21011000?2020022??110200103?011001101211201011?10102111110111113201?12?1310211??02220?111000?1112??11???1211?1?11?111???0?1??1210?00?2210???0112212?
	Tetragonias                    120222101100002000022??110(1 2)001020001001000111201121110102111110111113201012?1310211010?221111111011112??111301211010111111200001001210100?22101111122212?
	Shansiodon                     120222101100002000022??1101001?2?00110100011120112111010211111?????13201?12?131??1?0?02220?11111011112??1013022110?01??1112?0001??1210111?2210???1112212?
	Vinceria                       1202221011000?2000022??11020010200?10010001112011211101020111??11111?20??12?1310211??022?0?11111??1??2?????????????????111???????????????????????????????
	Rhinodicynodon                 120222101100002000022??1101001021001101000111201121010102111110????1320?112?131??1?0?022?????1010?1112??11130221??1?1??111??000100101?100????0111112?????
	Angonisaurus                   1202221?1100002?00112??1101001???0010011002110011111101020111??11111?20?1???131??110?02220???111011112??11130121101011?1113??00100?20?10?????0111????????
	Dinodontosaurus                120222101100002010022??110100103100100100011120112111010211111011111?20001101310111?1022211???10011112??11130121101001?111300001001200101?22101110122212?
	Stahleckeria                   120202101100002120112??110100003100101110101100101121010201111011111320111101310111110222111?110011112??111301211011011111310101001210101?22101111112212?
	Jachaleria                     120222101100002110112??11010010310110111001112011212101020111111111132010?2?1310111?1022200??1100??112??1?1?0??????????111210010????????1????0111111?????
	Ischigualastia                 120222101100002120112??1101000031001011101?1120112121010200111111111320??12?1310511?102220?111100?1112??111301??????01?111210100101200101?22101111112212?
	Rabidosaurus                   120222101000002110022??110?000?3?0010011?121?0?1??1?111?2?111??????1220101??131?11???0?2??1??1?001???????????????????????????????????????????????????????
	Rhadiodromus                   120222101100002010022??11020000310(0 1)1001101311201021?101020111??11111320?1?10131??1?1102220???1110????????????????????????????????????????????????????????
	Wadiasaurus                    1202221010000?21100(1 2)2??110?000???0010??001?11011??111010201?110????1?20??12?131??1???02220???111??1112??1?130???????11?111200101?01211101????0111111?????
	Rechnisaurus                   1202221011000?2010122??110?00003000100100121?101021?1??02??????????1?20?0110131??1???02220??????0????????????????????????????????????????????????????????
	Kannemeyeria_lophorhinus       120222101000002110122??010100003200200100111121102111110201111?111113201?12?131111101022201??1000?1112??11130121??10010111???00???12?110?????0???????????
	Sangusaurus                    1202221011000???10112??1101000?3?0?101?00??112010211101???11??0????13201????131?11???02221????10011112???1130121????01?1112??????????????????0111111?????
	Uralokannemeyeria              1202221?11000?2??0122???10?000????01?011012111010?1?101?201111011111?20?????13?1211??02220???1100???????????????????????1?2??????????????????0???????????
	Placerias                      1200221??000002000022??11100000310?1001101110001111210122011110?????????????1??05111002220?11110111112??10130???10?11??111?00111001?0010?????1111111????1
	Moghreberia                    1?00221010000??020022???102000?3?0??0011?1110001111210?2201???01111132011????3???1??0?2220????101?1112??1?13012110??0??111???????????????????????????????
	Eubrachiosaurus                ?????????????????????????????????????????????????????????????????????????????????????????????????????????????????????????????101??1?0010?????0???????????
	Zambiasaurus                   1202221??1???????0012???1?0?????????00???101100???1210??2?1???0???????????????????????????????110???12??1?1??????0???????1?0?111001?01100????0111111?????
	Shaanbeikannemeyeria           120222101100002010022??11010000310010011011112010?111110211111?11111320111?0131?211??02220????100?1112??101??121??????1?11???001??1??1100????????011?????

;

END;
BEGIN NOTES;

	CHARACTERS = Continuous_characters TAXA = Anomodontia;
	TEXT   TAXON = 1 CHARACTER = 20 TEXT = '0.0^n';

	CHARACTERS = Character_Matrix TAXA = Anomodontia;

		MESQUITESCRIPTVERSION 2;
		TITLE AUTO;
		tell ProjectCoordinator;
		getEmployee #mesquite.minimal.ManageTaxa.ManageTaxa;
		tell It;
			setID 0 4036902025386179177;
			tell It;
				setDefaultOrder 0 1 2 3 4 5 7 6 8 9 10 11 12 13 14 15 16 17 18 19 20 22 23 24 25 26 27 28 29 30 31 32 33 34 35 36 37 38 39 40 41 42 43 44 45 46 47 48 49 50 51 52 53 54 55 56 57 58 59 60 61 62 63 64 65 66 67 68 69 70 71 72 73 74 75 76 77 78 79 80 81 82 83 84 85 86 87 88 89 90 91 92 93 94 95 96 97 21 98;
				attachments;
			endTell;
		endTell;
		getEmployee #mesquite.charMatrices.ManageCharacters.ManageCharacters;
		tell It;
			setID 0 975778649696789057;
			checksumv 0 2 2816279420 null;
			setID 1 5244925939419518926;
			tell It;
				setDefaultOrder 0 1 2 3 4 5 6 132 7 8 9 10 135 11 12 13 14 15 16 17 18 19 20 21 22 23 131 24 25 26 134 27 133 28 130 29 30 154 31 32 122 33 34 35 36 37 147 38 125 39 40 41 42 43 44 45 46 136 47 48 49 50 51 52 53 54 55 56 57 58 59 60 61 146 62 155 63 64 65 129 66 67 68 69 70 71 72 73 74 75 76 77 78 79 80 123 126 81 82 83 84 85 86 87 88 121 89 90 91 92 93 127 94 95 96 97 137 98 99 100 101 102 103 144 104 138 143 105 106 107 108 109 110 128 111 112 114 119 139 140 141 113 115 124 116 144 117 118 148 149 150 151 120;
				attachments;
			endTell;
			checksumv 1 2 2983323226 null;
		endTell;
		getWindow;
		tell It;
			suppress;
			setResourcesState false false 113;
			setPopoutState 400;
			setExplanationSize 0;
			setAnnotationSize 0;
			setFontIncAnnot 0;
			setFontIncExp 0;
			setSize 1280 642;
			setLocation - 3 32;
			setFont SanSerif;
			setFontSize 10;
			getToolPalette;
			tell It;
			endTell;
			desuppress;
		endTell;
		getEmployee #mesquite.charMatrices.BasicDataWindowCoord.BasicDataWindowCoord;
		tell It;
			showDataWindow #5244925939419518926 #mesquite.charMatrices.BasicDataWindowMaker.BasicDataWindowMaker;
			tell It;
				getWindow;
				tell It;
					getTable;
					tell It;
						rowNamesWidth 187;
					endTell;
					setExplanationSize 30;
					setAnnotationSize 20;
					setFontIncAnnot 0;
					setFontIncExp 0;
					setSize 1167 575;
					setLocation - 3 32;
					setFont SanSerif;
					setFontSize 10;
					getToolPalette;
					tell It;
						setTool mesquite.charMatrices.BasicDataWindowMaker.BasicDataWindow.ibeam;
					endTell;
					setActive;
					setTool mesquite.charMatrices.BasicDataWindowMaker.BasicDataWindow.ibeam;
					colorCells #mesquite.charMatrices.NoColor.NoColor;
					colorRowNames #mesquite.charMatrices.TaxonGroupColor.TaxonGroupColor;
					colorColumnNames #mesquite.charMatrices.CharGroupColor.CharGroupColor;
					colorText #mesquite.charMatrices.NoColor.NoColor;
					setBackground White;
					toggleShowNames on;
					toggleShowTaxonNames on;
					toggleTight off;
					toggleThinRows off;
					toggleShowChanges on;
					toggleSeparateLines off;
					toggleShowStates on;
					toggleAutoWCharNames on;
					toggleShowDefaultCharNames off;
					toggleConstrainCW on;
					toggleBirdsEye off;
					toggleAllowAutosize on;
					toggleColorsPanel off;
					toggleDiagonal on;
					setDiagonalHeight 80;
					toggleLinkedScrolling on;
					toggleScrollLinkedTables off;
				endTell;
				showWindow;
				getWindow;
				tell It;
					forceAutosize;
				endTell;
				getEmployee #mesquite.charMatrices.ColorCells.ColorCells;
				tell It;
					setColor Red;
					removeColor off;
				endTell;
				getEmployee #mesquite.categ.StateNamesStrip.StateNamesStrip;
				tell It;
					showStrip off;
				endTell;
				getEmployee #mesquite.charMatrices.AnnotPanel.AnnotPanel;
				tell It;
					togglePanel off;
				endTell;
				getEmployee #mesquite.charMatrices.CharReferenceStrip.CharReferenceStrip;
				tell It;
					showStrip off;
				endTell;
				getEmployee #mesquite.charMatrices.QuickKeySelector.QuickKeySelector;
				tell It;
					autotabOff;
				endTell;
				getEmployee #mesquite.stratigraphictools.ColorScaleCells.ColorScaleCells;
				tell It;
					setColor Red;
					removeColor off;
				endTell;
				getEmployee #mesquite.categ.SmallStateNamesEditor.SmallStateNamesEditor;
				tell It;
					panelOpen true;
				endTell;
			endTell;
			showDataWindow #975778649696789057 #mesquite.charMatrices.BasicDataWindowMaker.BasicDataWindowMaker;
			tell It;
				getWindow;
				tell It;
					setExplanationSize 30;
					setAnnotationSize 20;
					setFontIncAnnot 0;
					setFontIncExp 0;
					setSize 1167 575;
					setLocation - 3 32;
					setFont SanSerif;
					setFontSize 10;
					getToolPalette;
					tell It;
						setTool mesquite.charMatrices.BasicDataWindowMaker.BasicDataWindow.ibeam;
					endTell;
					setTool mesquite.charMatrices.BasicDataWindowMaker.BasicDataWindow.ibeam;
					colorCells #mesquite.charMatrices.NoColor.NoColor;
					colorRowNames #mesquite.charMatrices.TaxonGroupColor.TaxonGroupColor;
					colorColumnNames #mesquite.charMatrices.CharGroupColor.CharGroupColor;
					colorText #mesquite.charMatrices.NoColor.NoColor;
					setBackground White;
					toggleShowNames on;
					toggleShowTaxonNames on;
					toggleTight off;
					toggleThinRows off;
					toggleShowChanges on;
					toggleSeparateLines off;
					toggleShowStates on;
					toggleAutoWCharNames on;
					toggleShowDefaultCharNames off;
					toggleConstrainCW on;
					toggleBirdsEye off;
					toggleAllowAutosize on;
					toggleColorsPanel off;
					toggleLinkedScrolling on;
					toggleScrollLinkedTables off;
				endTell;
				showWindow;
				getWindow;
				tell It;
					forceAutosize;
				endTell;
				getEmployee #mesquite.charMatrices.ColorCells.ColorCells;
				tell It;
					setColor Red;
					removeColor off;
				endTell;
				getEmployee #mesquite.charMatrices.AnnotPanel.AnnotPanel;
				tell It;
					togglePanel off;
				endTell;
				getEmployee #mesquite.charMatrices.CharReferenceStrip.CharReferenceStrip;
				tell It;
					showStrip off;
				endTell;
				getEmployee #mesquite.stratigraphictools.ColorScaleCells.ColorScaleCells;
				tell It;
					setColor Red;
					removeColor off;
				endTell;
				getEmployee #mesquite.cont.ItemsEditorForInfoPanel.ItemsEditorForInfoPanel;
				tell It;
					panelOpen false;
				endTell;
			endTell;
		endTell;
		endTell;

END;

BEGIN MESQUITECHARMODELS;
	ProbModelSet * UNTITLED  (CHARACTERS = Continuous_characters)  =  Brownian_default:  1 -  20;
ProbModelSet * UNTITLED  (CHARACTERS = Character_Matrix)  =  'Mk1 (est.)':  1 -  153;
END;

BEGIN ASSUMPTIONS;
	TYPESET * UNTITLED  (CHARACTERS = Continuous_characters)  =  Squared:  1 -  21;
TYPESET * UNTITLED  (CHARACTERS = Character_Matrix)  =  unord:  1 -  153;

END;

Begin MESQUITE;
		MESQUITESCRIPTVERSION 2;
		TITLE AUTO;
		tell ProjectCoordinator;
		timeSaved 1365024759793;
		getEmployee #mesquite.minimal.ManageTaxa.ManageTaxa;
		tell It;
			setID 0 3538277207083307376;
			tell It;
				setDefaultOrder  0 1 2 3 4 5 6 7 8 9 10 11 12 13 14 15 16 17 18 19 20 21 97 22 23 24 96 25 26 27 28 29 30 31 32 33 34 35 36 37 38 39 40 41 42 43 44 45 46 47 48 49 50 51 52 53 54 55 56 57 58 59 60 61 62 63 64 65 66 67 68 69 70 71 72 73 74 75 76 77 78 79 80 81 82 83 84 85 86 87 88 89 90 91 92 93 94 95;
				attachments ;
			endTell;
		endTell;
		getEmployee #mesquite.charMatrices.ManageCharacters.ManageCharacters;
		tell It;
			setID 0 586089187122190076;
			tell It;
				setDefaultOrder  0 8 2 3 4 5 6 7 1 9 10 11 12 13 14 15 16 17 18 19 20;
				attachments ;
			endTell;
			mqVersion 275;
			checksumv 0 3 1427098345 null  numChars 21   numItems 1   min 0.0   max 15.5   sumSquares 21707.641810999987   NumFiles 1 NumMatrices 2;
			mqVersion;
			setID 1 782982588498460543;
			mqVersion 275;
			checksumv 1 3 278906067 null  getNumChars 153 numChars 153 getNumTaxa 98 numTaxa 98   short true   bits 63   states 63   sumSquaresStatesOnly 60033.0 sumSquares 60033.0 longCompressibleToShort false usingShortMatrix true   NumFiles 1 NumMatrices 2;
			mqVersion;
		endTell;
		getWindow;
		tell It;
			suppress;
			setResourcesState false false 100;
			setPopoutState 400;
			setExplanationSize 0;
			setAnnotationSize 0;
			setFontIncAnnot 0;
			setFontIncExp 0;
			setSize 1266 645;
			setLocation 116 115;
			setFont SanSerif;
			setFontSize 10;
			getToolPalette;
			tell It;
			endTell;
			desuppress;
		endTell;
		getEmployee  #mesquite.minimal.ManageTaxa.ManageTaxa;
		tell It;
			showTaxa #3538277207083307376 #mesquite.lists.TaxonList.TaxonList;
			tell It;
				setTaxa #3538277207083307376;
				getWindow;
				tell It;
					newAssistant  #mesquite.lists.DefaultTaxaOrder.DefaultTaxaOrder;
					newAssistant  #mesquite.lists.TaxonListCurrPartition.TaxonListCurrPartition;
					setExplanationSize 30;
					setAnnotationSize 20;
					setFontIncAnnot 0;
					setFontIncExp 0;
					setSize 1166 578;
					setLocation 116 115;
					setFont SanSerif;
					setFontSize 10;
					getToolPalette;
					tell It;
						setTool mesquite.lists.TaxonList.TaxonListWindow.ibeam;
					endTell;
				endTell;
				showWindow;
				getEmployee #mesquite.lists.ColorTaxon.ColorTaxon;
				tell It;
					setColor Red;
					removeColor off;
				endTell;
				getEmployee #mesquite.lists.TaxonListAnnotPanel.TaxonListAnnotPanel;
				tell It;
					togglePanel off;
				endTell;
			endTell;
		endTell;
		getEmployee  #mesquite.charMatrices.BasicDataWindowCoord.BasicDataWindowCoord;
		tell It;
			showDataWindow #782982588498460543 #mesquite.charMatrices.BasicDataWindowMaker.BasicDataWindowMaker;
			tell It;
				getWindow;
				tell It;
					setExplanationSize 30;
					setAnnotationSize 20;
					setFontIncAnnot 0;
					setFontIncExp 0;
					setSize 1166 578;
					setLocation 116 115;
					setFont SanSerif;
					setFontSize 10;
					getToolPalette;
					tell It;
						setTool mesquite.charMatrices.BasicDataWindowMaker.BasicDataWindow.ibeam;
					endTell;
					setActive;
					setTool mesquite.charMatrices.BasicDataWindowMaker.BasicDataWindow.ibeam;
					colorCells  #mesquite.charMatrices.NoColor.NoColor;
					colorRowNames  #mesquite.charMatrices.TaxonGroupColor.TaxonGroupColor;
					colorColumnNames  #mesquite.charMatrices.CharGroupColor.CharGroupColor;
					colorText  #mesquite.charMatrices.NoColor.NoColor;
					setBackground White;
					toggleShowNames on;
					toggleShowTaxonNames on;
					toggleTight off;
					toggleThinRows off;
					toggleShowChanges on;
					toggleSeparateLines off;
					toggleShowStates on;
					toggleAutoWCharNames on;
					toggleAutoTaxonNames off;
					toggleShowDefaultCharNames off;
					toggleConstrainCW on;
					toggleBirdsEye off;
					toggleShowPaleGrid off;
					toggleShowPaleCellColors off;
					togglePaleInapplicable on;
					toggleShowBoldCellText off;
					toggleAllowAutosize on;
					toggleColorsPanel off;
					toggleDiagonal on;
					setDiagonalHeight 80;
					toggleLinkedScrolling on;
					toggleScrollLinkedTables off;
				endTell;
				showWindow;
				getWindow;
				tell It;
					forceAutosize;
				endTell;
				getEmployee #mesquite.charMatrices.ColorByState.ColorByState;
				tell It;
					setStateLimit 9;
					toggleUniformMaximum on;
				endTell;
				getEmployee #mesquite.charMatrices.ColorCells.ColorCells;
				tell It;
					setColor Red;
					removeColor off;
				endTell;
				getEmployee #mesquite.categ.StateNamesStrip.StateNamesStrip;
				tell It;
					showStrip off;
				endTell;
				getEmployee #mesquite.charMatrices.AnnotPanel.AnnotPanel;
				tell It;
					togglePanel off;
				endTell;
				getEmployee #mesquite.charMatrices.CharReferenceStrip.CharReferenceStrip;
				tell It;
					showStrip off;
				endTell;
				getEmployee #mesquite.charMatrices.QuickKeySelector.QuickKeySelector;
				tell It;
					autotabOff;
				endTell;
				getEmployee #mesquite.charMatrices.SelSummaryStrip.SelSummaryStrip;
				tell It;
					showStrip off;
				endTell;
				getEmployee #mesquite.categ.SmallStateNamesEditor.SmallStateNamesEditor;
				tell It;
					panelOpen true;
				endTell;
			endTell;
			showDataWindow #586089187122190076 #mesquite.charMatrices.BasicDataWindowMaker.BasicDataWindowMaker;
			tell It;
				getWindow;
				tell It;
					setExplanationSize 30;
					setAnnotationSize 20;
					setFontIncAnnot 0;
					setFontIncExp 0;
					setSize 1166 578;
					setLocation 116 115;
					setFont SanSerif;
					setFontSize 10;
					getToolPalette;
					tell It;
						setTool mesquite.charMatrices.BasicDataWindowMaker.BasicDataWindow.ibeam;
					endTell;
					setTool mesquite.charMatrices.BasicDataWindowMaker.BasicDataWindow.ibeam;
					colorCells  #mesquite.charMatrices.NoColor.NoColor;
					colorRowNames  #mesquite.charMatrices.TaxonGroupColor.TaxonGroupColor;
					colorColumnNames  #mesquite.charMatrices.CharGroupColor.CharGroupColor;
					colorText  #mesquite.charMatrices.NoColor.NoColor;
					setBackground White;
					toggleShowNames on;
					toggleShowTaxonNames on;
					toggleTight off;
					toggleThinRows off;
					toggleShowChanges on;
					toggleSeparateLines off;
					toggleShowStates on;
					toggleAutoWCharNames on;
					toggleAutoTaxonNames off;
					toggleShowDefaultCharNames off;
					toggleConstrainCW on;
					toggleBirdsEye off;
					toggleShowPaleGrid off;
					toggleShowPaleCellColors off;
					togglePaleInapplicable on;
					toggleShowBoldCellText off;
					toggleAllowAutosize on;
					toggleColorsPanel off;
					toggleLinkedScrolling on;
					toggleScrollLinkedTables off;
				endTell;
				showWindow;
				getWindow;
				tell It;
					forceAutosize;
				endTell;
				getEmployee #mesquite.charMatrices.ColorByState.ColorByState;
				tell It;
					setStateLimit 9;
					toggleUniformMaximum on;
				endTell;
				getEmployee #mesquite.charMatrices.ColorCells.ColorCells;
				tell It;
					setColor Red;
					removeColor off;
				endTell;
				getEmployee #mesquite.charMatrices.AnnotPanel.AnnotPanel;
				tell It;
					togglePanel off;
				endTell;
				getEmployee #mesquite.charMatrices.CharReferenceStrip.CharReferenceStrip;
				tell It;
					showStrip off;
				endTell;
				getEmployee #mesquite.charMatrices.SelSummaryStrip.SelSummaryStrip;
				tell It;
					showStrip off;
				endTell;
				getEmployee #mesquite.cont.ItemsEditorForInfoPanel.ItemsEditorForInfoPanel;
				tell It;
					panelOpen false;
				endTell;
			endTell;
		endTell;
		endTell;
end;
